# Supplementary material for: Fibroblast Growth Factor 21 Attenuates Diabetes-Induced Renal Fibrosis by Negatively Regulating TGF-β-p53-Smad2/3-Mediated Epithelial-to-Mesenchymal Transition via Activation of AKT
Source: PubMed Central journal article supplement — Diabetes Metab J. 2019 Oct 28;44(1):158–72. doi: 10.4093/dmj.2018.0235 (PMC7043973; doi:10.4093/dmj.2018.0235), 2019-10-28
Supplement: dmj-44-158-s001.pdf [file dmj-44-158-s001.pdf]

**Supplementary Table 1.** Effects of FGF21 supplement on renal function and hyperglycemia in DN mice

| Parameter    | Con        | FGF21      | DN                       | DN/FGF21                   |
|--------------|------------|------------|--------------------------|----------------------------|
| BW, g        | 23.57±2.12 | 20.67±1.98 | 32.13±1.74 <sup>a</sup>  | 27.67±1.66 <sup>a,b</sup>  |
| KW/TL, mg/mm | 23.6±2.02  | 22.78±1.87 | 43.27±3.26 <sup>a</sup>  | 34.62±3.33 <sup>a,b</sup>  |
| UV, mL/day   | 1.34±0.36  | 1.30±0.22  | 8.52±1.98 <sup>a</sup>   | 5.01±1.21 <sup>a,b</sup>   |
| UP, mg/day   | 46.35±3.89 | 41.87±4.18 | 153.86±5.98 <sup>a</sup> | 98.68±4.19 <sup>a,b</sup>  |
| sCr, mg/dL   | 0.24±0.06  | 0.21±0.03  | 0.63±0.07 <sup>a</sup>   | 0.41±0.06 <sup>a,b</sup>   |
| mAlb, µg/day | 6.53±1.28  | 6.33±2.12  | 187.65±5.75 <sup>a</sup> | 89.32±6.11 <sup>a,b</sup>  |
| uCr, mg/L    | 2.4±0.37   | 2.1±0.26   | 6.3±0.27 <sup>a</sup>    | 4.1±0.21 <sup>a,b</sup>    |
| BUN, mg/dL   | 21.55±3.18 | 18.95±2.73 | 39.76±1.48 <sup>a</sup>  | 28.64±3.26 <sup>a,b</sup>  |
| UACR, µg/mg  | 27.20±4.27 | 30.14±4.86 | 297.86±6.43 <sup>a</sup> | 217.85±6.87 <sup>a,b</sup> |
| BG, mmol/L   | 5.64±1.03  | 5.14±0.77  | 29.42±1.55 <sup>a</sup>  | 25.89±1.28 <sup>a,b</sup>  |
| HbA1c, %     | 5.12±0.55  | 4.98±0.28  | 11.25±0.68 <sup>a</sup>  | 9.21±0.38 <sup>a,b</sup>   |

Values are presented as mean ± standard deviation ( $n=8$ /group).

FGF21, fibroblast growth factor 21; DN, diabetic nephropathy; Con, control; BW, body weight; KW, kidney weight; TL, tibia length; UV, urine volume; UP, urinary protein; sCr, serum creatinine; mAlb, micro albumin; uCr, urinary creatinine; BUN, blood urea nitrogen; UACR, urinary albumin/urinary creatinine; BG, blood glucose; HbA1c, glycosylated hemoglobin.

<sup>a</sup> $P<0.05$  vs. the Con group, <sup>b</sup> $P<0.05$  vs. DN group.
