# Supplementary material for: Fibroblast Growth Factor 21 Attenuates Diabetes-Induced Renal Fibrosis by Negatively Regulating TGF-β-p53-Smad2/3-Mediated Epithelial-to-Mesenchymal Transition via Activation of AKT
Source: PubMed Central journal article supplement — Diabetes Metab J. 2019 Oct 28;44(1):158–72. doi: 10.4093/dmj.2018.0235 (PMC7043973; doi:10.4093/dmj.2018.0235), 2019-10-28
Supplement: dmj-44-158-s002.pdf [file dmj-44-158-s002.pdf]

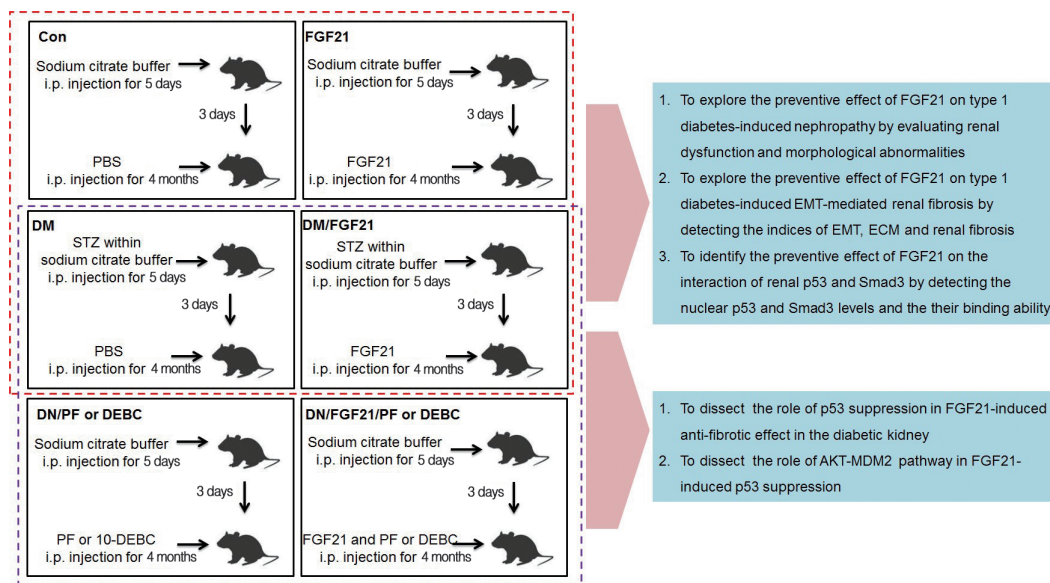

**Supplementary Fig. 1.** Technical route of our study. Con, control; i.p., intraperitoneal; PBS, phosphate-buffered saline; FGF21, fibroblast growth factor 21; DM, diabetes mellitus; STZ, streptozocin; DN, diabetic nephropathy; PF, pifithrin; DEBC, [4'-(N,N-Diethylamino)butyl]-2-chlorophenoxazine hydrochloride; EMT, epithelial-to-mesenchymal transition; ECM, extracellular matrix; MDM2, mouse double minute-2 homolog.
