# Supplementary material for: Fibroblast Growth Factor 21 Attenuates Diabetes-Induced Renal Fibrosis by Negatively Regulating TGF-β-p53-Smad2/3-Mediated Epithelial-to-Mesenchymal Transition via Activation of AKT
Source: PubMed Central journal article supplement — Diabetes Metab J. 2019 Oct 28;44(1):158–72. doi: 10.4093/dmj.2018.0235 (PMC7043973; doi:10.4093/dmj.2018.0235), 2019-10-28
Supplement: dmj-44-158-s003.pdf [file dmj-44-158-s003.pdf]

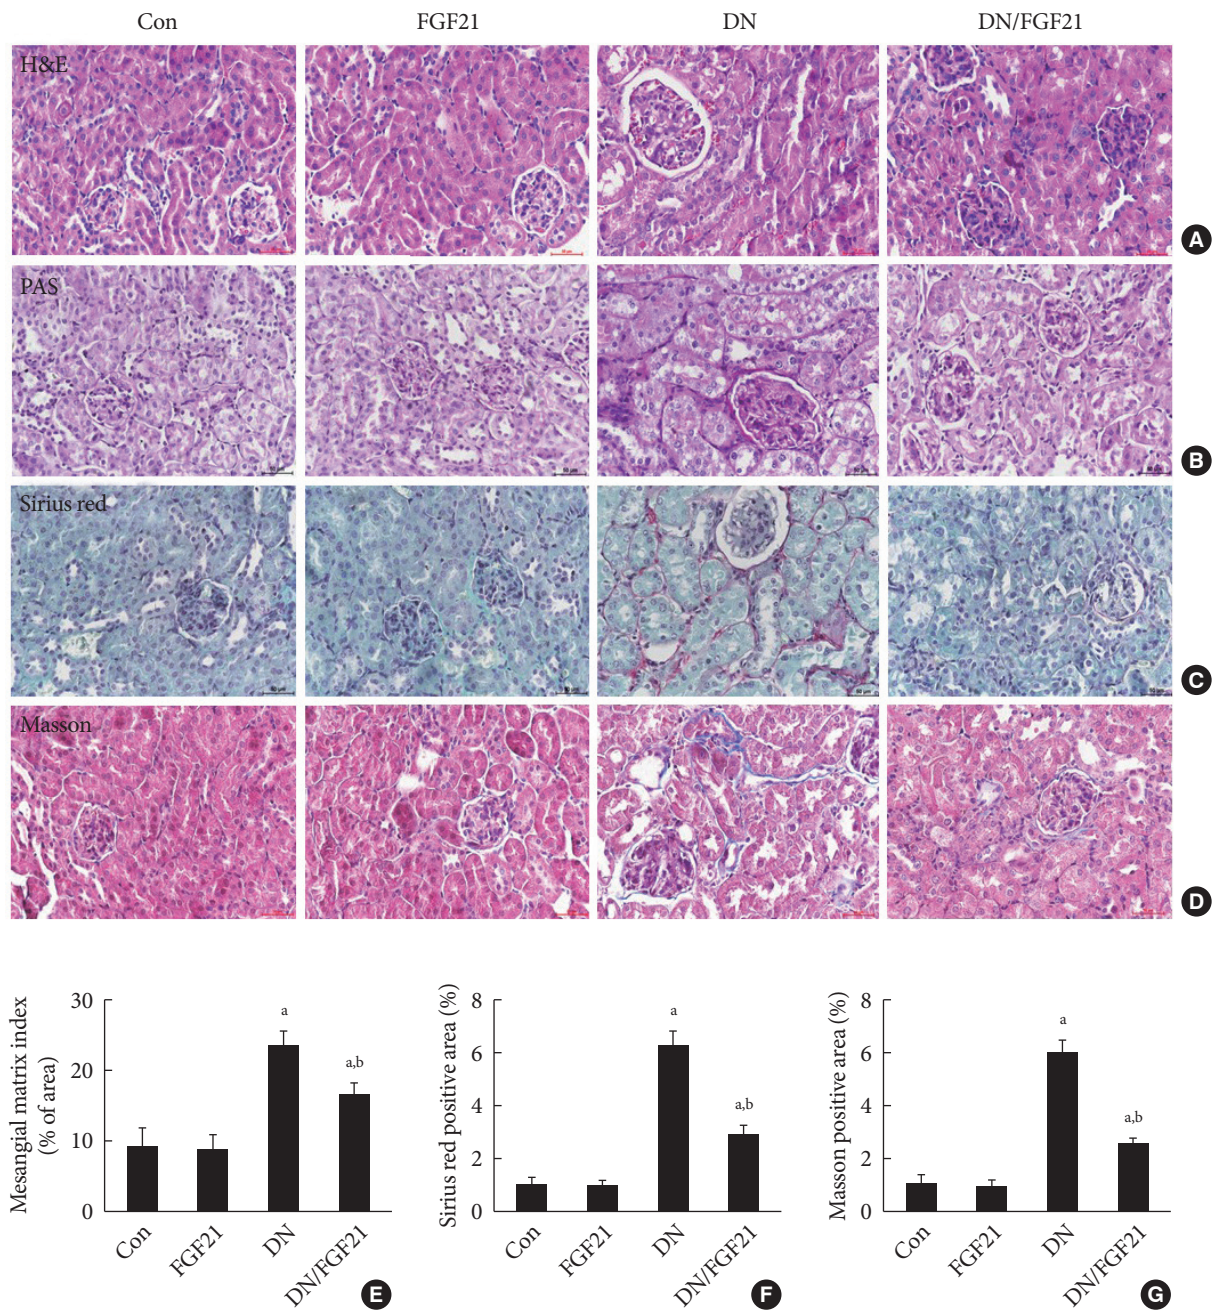

**Supplementary Fig. 2.** Effects of fibroblast growth factor 21 (FGF21) supplement on renal pathological changes and fibrosis in diabetic nephropathy (DN) mice. After the mice were killed, the renal tissues were collected for the morphological studies. Representative images of (A) H&E staining, (B) periodic acid–Schiff (PAS) staining, (C) Sirius red, and (D) Masson's trichrome staining for detection of renal pathological changes, glomerulosclerosis, and collagen deposition, respectively ( $\times 20$ ). Semi-quantitative analysis of (E) glomerulosclerosis and (F, G) collagen accumulation was done based on PAS, Sirius red, or Masson stained slices. Data are presented as mean  $\pm$  standard deviation ( $n=8/\text{group}$ ). <sup>a</sup> $P<0.05$  vs. the control (Con) group, <sup>b</sup> $P<0.05$  vs. DN group.
