# Supplementary material for: Fibroblast Growth Factor 21 Attenuates Diabetes-Induced Renal Fibrosis by Negatively Regulating TGF-β-p53-Smad2/3-Mediated Epithelial-to-Mesenchymal Transition via Activation of AKT
Source: PubMed Central journal article supplement — Diabetes Metab J. 2019 Oct 28;44(1):158–72. doi: 10.4093/dmj.2018.0235 (PMC7043973; doi:10.4093/dmj.2018.0235), 2019-10-28
Supplement: dmj-44-158-s004.pdf [file dmj-44-158-s004.pdf]

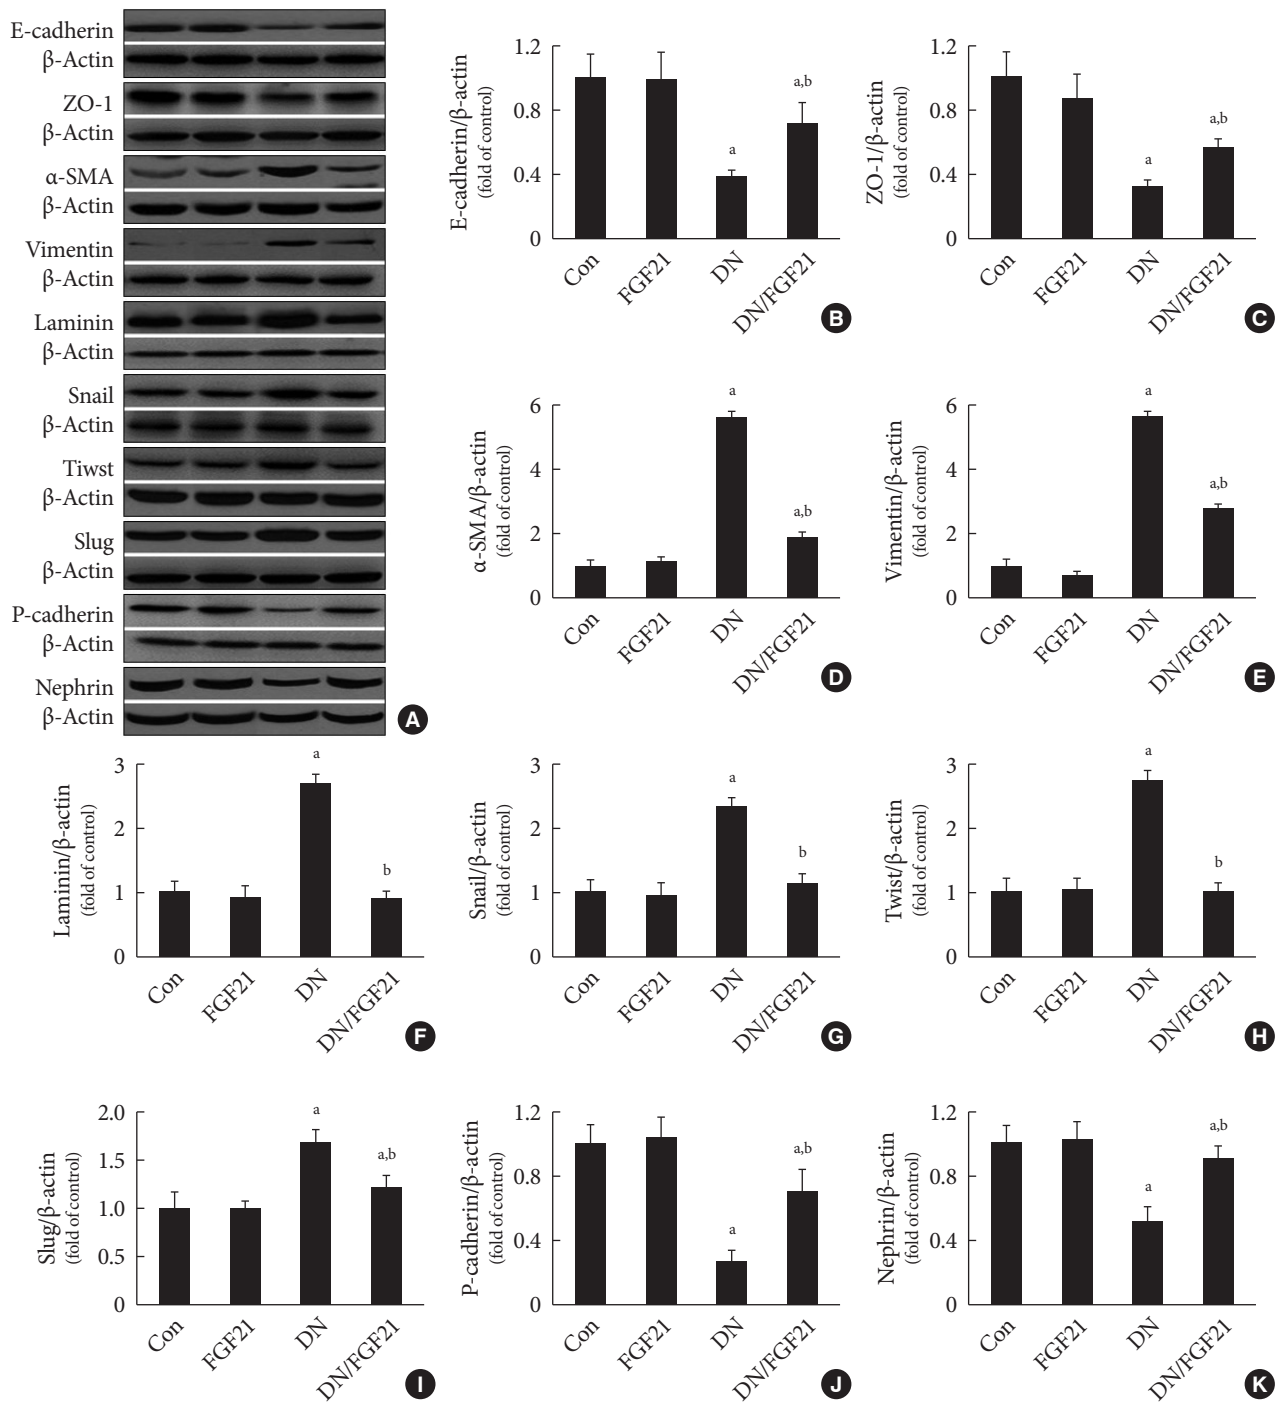

**Supplementary Fig. 3.** Effects of fibroblast growth factor 21 (FGF21) supplement on the epithelial-to-mesenchymal transition (EMT) in the diabetic kidney. Extracellular matrix accumulation and renal fibrosis are always attributed to enhanced EMT; therefore, Western blot analysis was used to examine the markers of EMT in the kidneys including (A, B) E-cadherin, (A, C) zonula occludens-1 (ZO-1), (A, D) α-smooth muscle actin (α-SMA), (A, E) vimentin, and (A, F) laminin. The expression of the negative regulators of E-cadherin including (A, G) snail, (A, H) twist, and (A, I) slug was determined by Western blotting. Meanwhile, (A, J) P-cadherin and (A, K) nephryn, the markers of podocytes, were also examined by Western blotting to evaluate the EMT in the glomeruli. Data are presented as the mean ± standard deviation ( $n=8$ /group). <sup>a</sup> $P<0.05$  vs. the control (Con) group, <sup>b</sup> $P<0.05$  vs. diabetic nephropathy (DN) group.
