# Supplementary material for: Fibroblast Growth Factor 21 Attenuates Diabetes-Induced Renal Fibrosis by Negatively Regulating TGF-β-p53-Smad2/3-Mediated Epithelial-to-Mesenchymal Transition via Activation of AKT
Source: PubMed Central journal article supplement — Diabetes Metab J. 2019 Oct 28;44(1):158–72. doi: 10.4093/dmj.2018.0235 (PMC7043973; doi:10.4093/dmj.2018.0235), 2019-10-28
Supplement: dmj-44-158-s005.pdf [file dmj-44-158-s005.pdf]

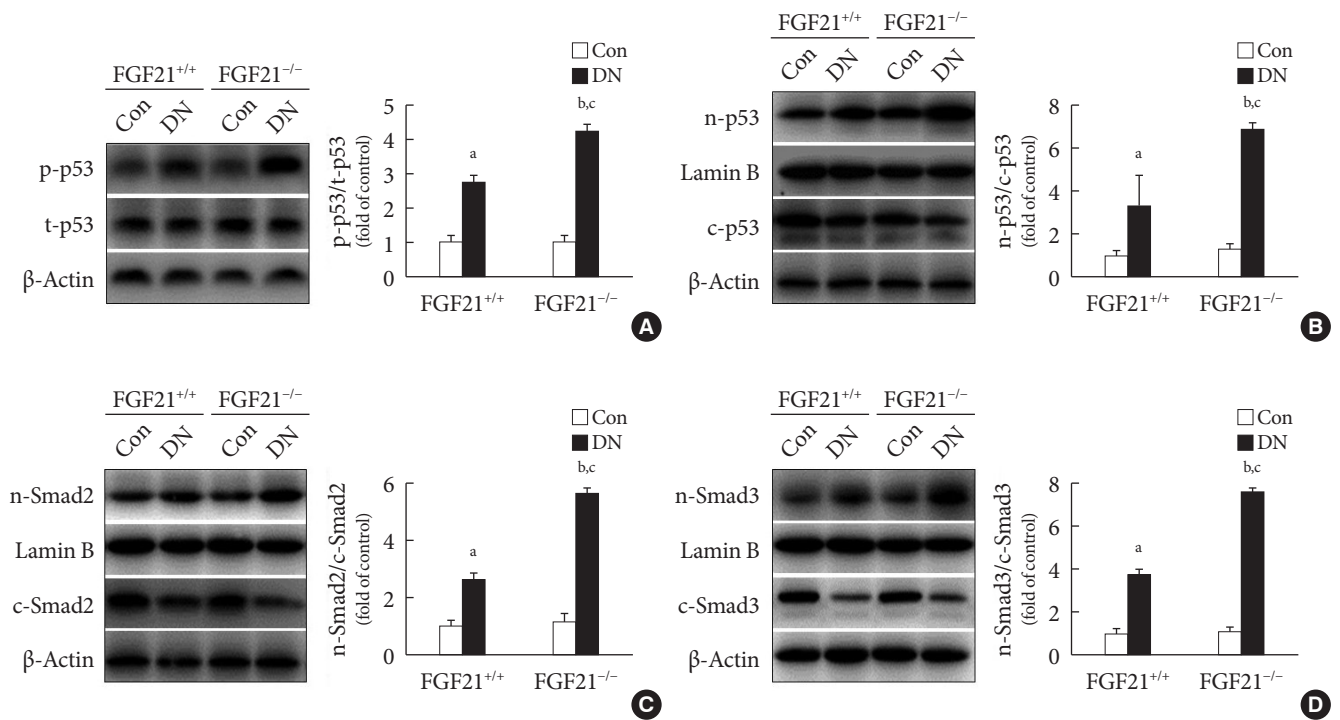

**Supplementary Fig. 4.** Effects of fibroblast growth factor 21 (FGF21) deletion on the renal p53 activity and the nuclear translocation of p53 and Smad2/3. Wild type and FGF21-knockout mice were received multiple low-dose streptozocin injection to induce type 1 diabetes mellitus. Mice in control group were treated with same volume of phosphate-buffered saline. Four months later the mice of each group were sacrificed and the kidney tissues were isolated for detecting renal p53 activity and expression (A), the ratio of nuclear content to cytosol content of p53 (B), Smad2 (C), and Smad3 (D). Data are presented as the mean  $\pm$  standard deviation ( $n=8$ /group). <sup>a</sup> $P<0.05$  vs. the control (Con) group in FGF21<sup>+/+</sup> mice, <sup>b</sup> $P<0.05$  vs. diabetic nephropathy (DN) in FGF21<sup>+/+</sup> mice, <sup>c</sup> $P<0.05$  vs. the Con group in FGF21<sup>-/-</sup> mice.
