# Supplementary material for: Fibroblast Growth Factor 21 Attenuates Diabetes-Induced Renal Fibrosis by Negatively Regulating TGF-β-p53-Smad2/3-Mediated Epithelial-to-Mesenchymal Transition via Activation of AKT
Source: PubMed Central journal article supplement — Diabetes Metab J. 2019 Oct 28;44(1):158–72. doi: 10.4093/dmj.2018.0235 (PMC7043973; doi:10.4093/dmj.2018.0235), 2019-10-28
Supplement: dmj-44-158-s006.pdf [file dmj-44-158-s006.pdf]

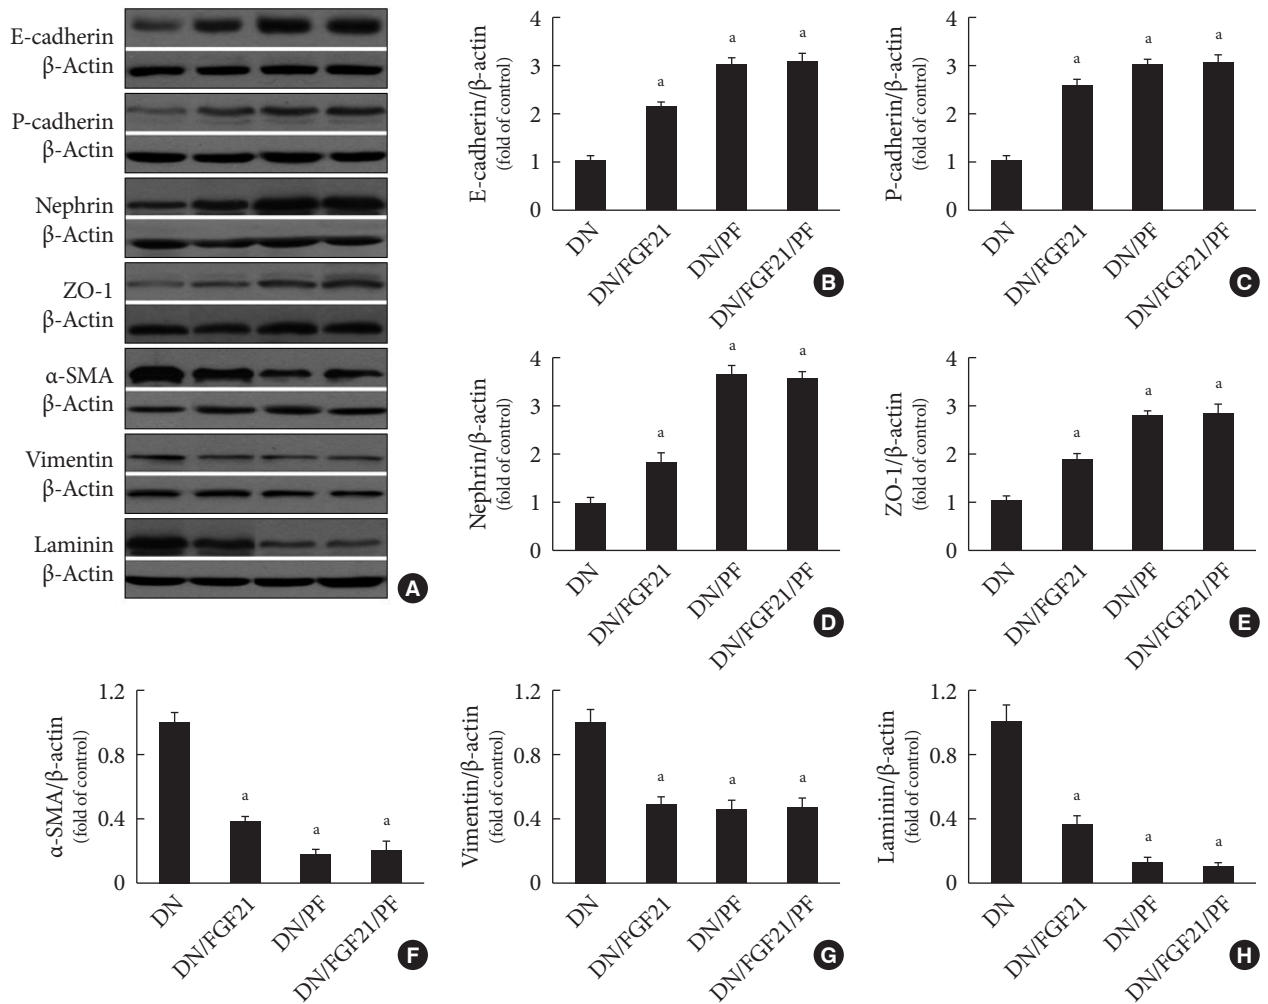

**Supplementary Fig. 5.** Effects of pifithrin- $\alpha$  (PF- $\alpha$ ) on fibroblast growth factor 21 (FGF21)-induced prevention of epithelial-to-mesenchymal transition (EMT) in the diabetic kidney. Western blot analysis was used to examine the markers of EMT in the kidneys including (A, B) E-cadherin, (A, C) P-cadherin, (A, D) nephrin, (A, E) zonula occludens-1 (ZO-1), (A, F)  $\alpha$ -smooth muscle actin ( $\alpha$ -SMA), (A, G) vimentin, and (A, H) laminin. Data are presented as the mean  $\pm$  standard deviation ( $n=8$ /group). <sup>a</sup> $P<0.05$  vs. the diabetic nephropathy (DN) group.
